# Supplementary material for: Membrane Environment Modulates Ligand-Binding Propensity of P2Y12 Receptor
Source: MDPI journal article supplement (doi:10.3390/pharmaceutics13040524), 2021-04-09
Supplement: s1 [file s1]

# Supplementary Materials: Membrane Environment Modulates Ligand Binding Propensity of P2Y<sub>12</sub> Receptor

Fatemeh Haghighi, Semen Yesylevskyy, Siamak Davani and Christophe Ramseyer

**Citation:** Haghighi, F.; Yesylevskyy, S.; Davani, S.; Ramseyer, C. Membrane Environment Modulates Ligand Binding Propensity of P2Y<sub>12</sub> Receptor. *Pharmaceutics* **2021**, *13*, 524. <https://doi.org/10.3390/pharmaceutics13040524>

Academic Editor: Fabrizio Dal Piaz

Received: 9 March 2021

Accepted: 6 April 2021

Published: 9 April 2021

**Publisher's Note:** MDPI stays neutral with regard to jurisdictional claims in published maps and institutional affiliations.

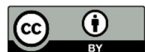

**Copyright:** © 2021 by the authors. Licensee MDPI, Basel, Switzerland. This article is an open access article distributed under the terms and conditions of the Creative Commons Attribution (CC BY) license (<http://creativecommons.org/licenses/by/4.0/>).

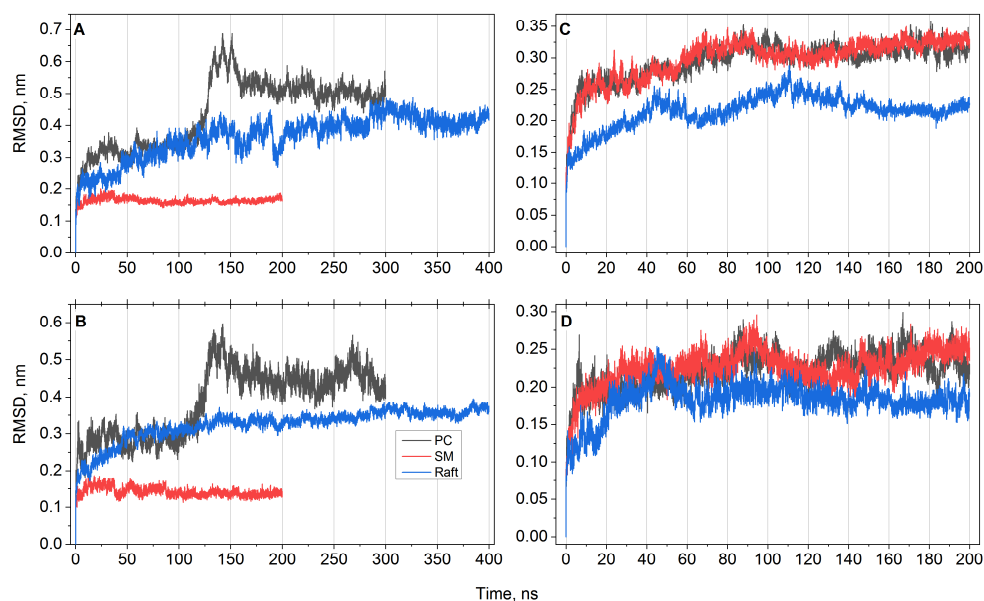

**Figure S1.** Root mean square deviations of the transmembrane part of P2Y<sub>12</sub> (A,C) and its active site (B,D) in the course of MD simulations in different lipid environments. A and C correspond to the open form of the receptor, while B and D correspond to the closed form.

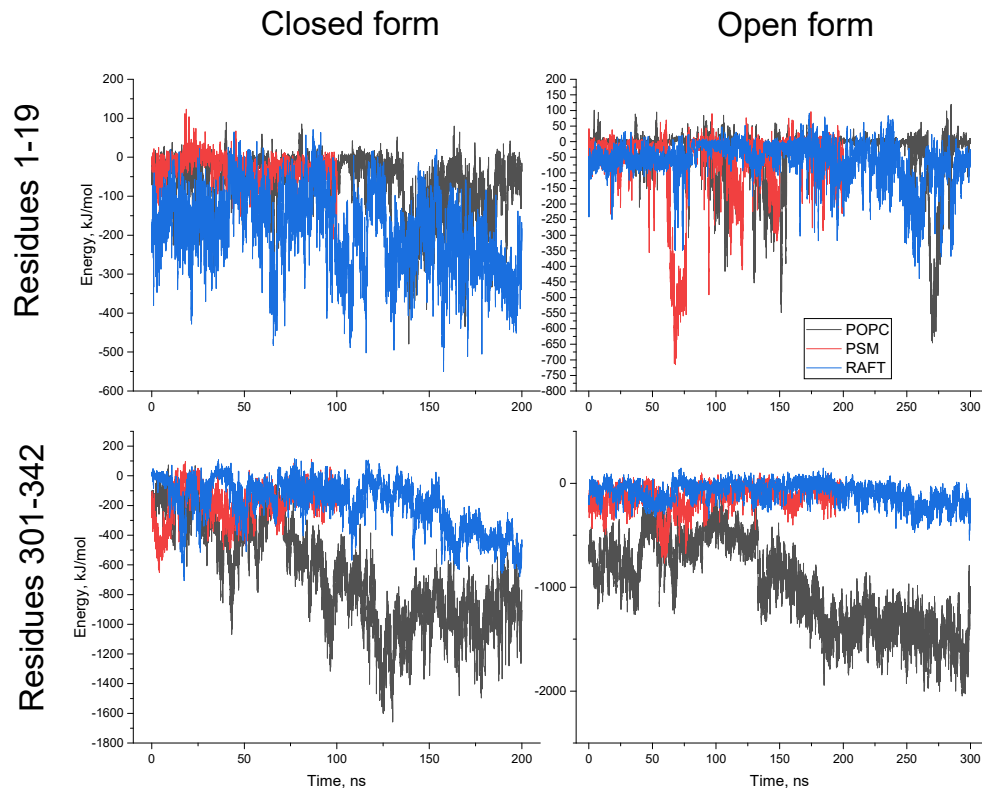

**Figure S2.** Interaction energies of the extracellular (residues 1–19) and intracellular (residues 301–342) P2Y<sub>12</sub> termini with the lipid bilayer for different membrane compositions and protein forms.

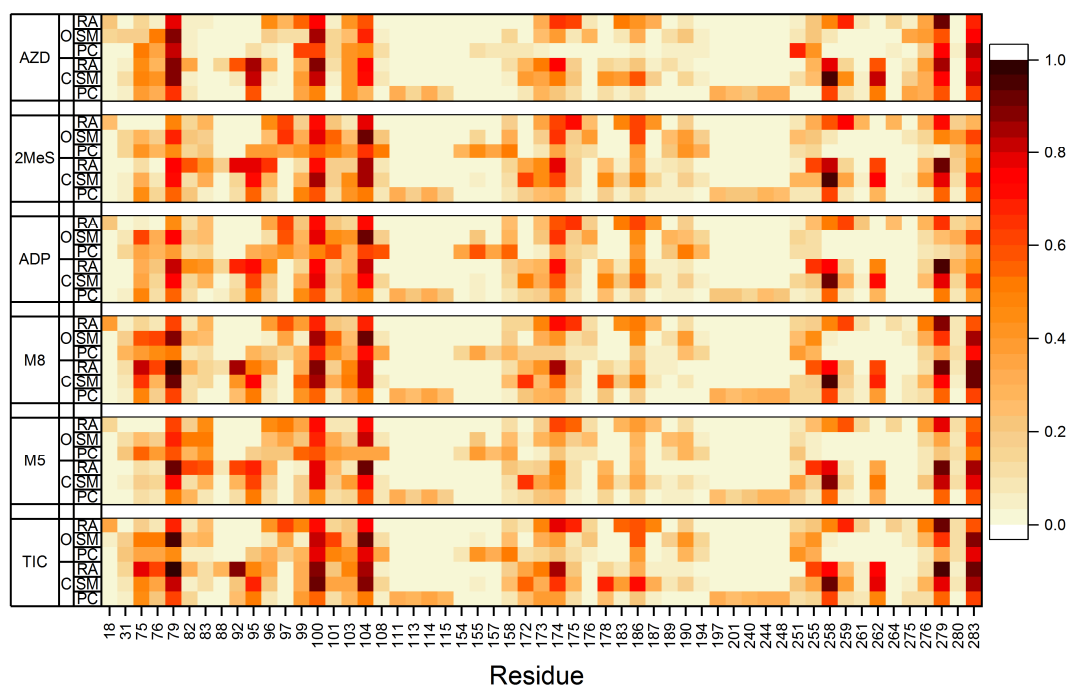

**Figure S3.** Probabilities of particular residues to be in contact with docked ligands in ensemble docking simulations. Only the residues with the contact probability higher than 25% for at least one ligand are shown. AZD: 6-[4-(benzylsulfonylcarbamoyl)piperidin-1-yl]-5-cyano-2-methylpyridine-3-carboxylate ; 2MeS: 2-Methylthioadenosine diphosphate ; ADP: adenosine diphosphate ; M8: active metabolite AR-C124910XX ; M5: metabolite AR-C133913XX , TIC: ticagrelor ; RA: Raft ; SM: sphingomyelin; PC: phosphatidylcholine

**Table S1.** Lateral diffusion coefficients of the lipids in the studied membranes.

| System | Lipid       | $D$ , $10^{-9}$ cm <sup>2</sup> /s |
|--------|-------------|------------------------------------|
| PC     | POPC        | $48.0 \pm 9.6$                     |
| SM     | PSM         | $2.3 \pm 0.06$                     |
| Raft   | PSM         | $1.7 \pm 0.7$                      |
|        | Cholesterol | $1.6 \pm 0.9$                      |

**Table S2.** Normalized overlaps between the covariance matrices computed for top three principal components of the P2Y12 binding pocket. \* (diagonal of the table) corresponds to the overlap between closed and open forms of the protein simulated in the same membrane environment. \*\* (top triangle of the table) corresponds to the overlaps between different membrane environments for the closed form of the protein. \*\*\* (bottom triangle of the table) corresponds to the overlaps between different membrane environments for the open form of the protein.

|      | PC       | SM       | Raft    |
|------|----------|----------|---------|
| PC   | * 0.27   | ** 0.29  | ** 0.33 |
| SM   | *** 0.23 | * 0.3    | ** 0.27 |
| Raft | *** 0.33 | *** 0.21 | * 0.28  |
